# Supplementary material for: Dynamic Profiling and Prediction of Antibody Response to SARS-CoV-2 Booster-Inactivated Vaccines by Microsample-Driven Biosensor and Machine Learning
Source: Vaccines (Basel). 2024 Mar 25;12(4):352. doi: 10.3390/vaccines12040352 (PMC11054503; doi:10.3390/vaccines12040352)
Supplement: Supplementary file 1 [file vaccines-12-00352-s001.zip › vaccines-2875504-supplementary.pdf]

## Supplementary Figures

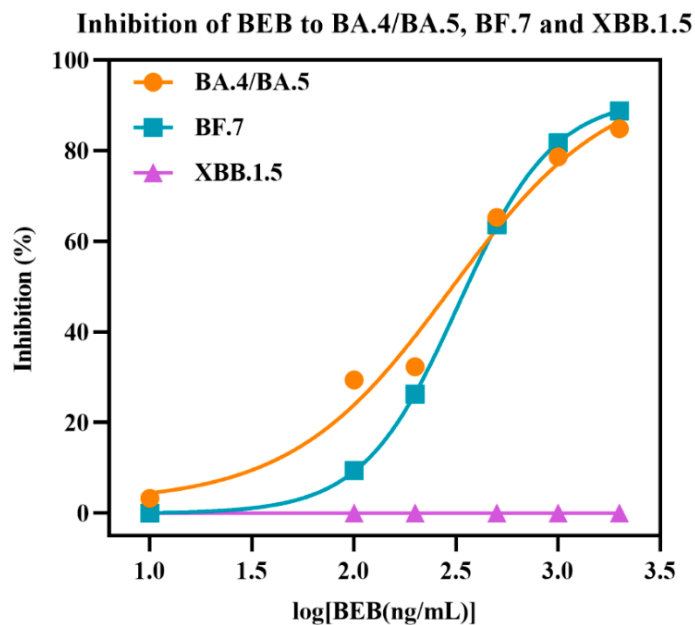

**Figure S1.** Inhibition of the calibrator BEB towards BA.4/BA.5, BF.7 and XBB.1.5 by the FO-BLI NAbs biosensor.

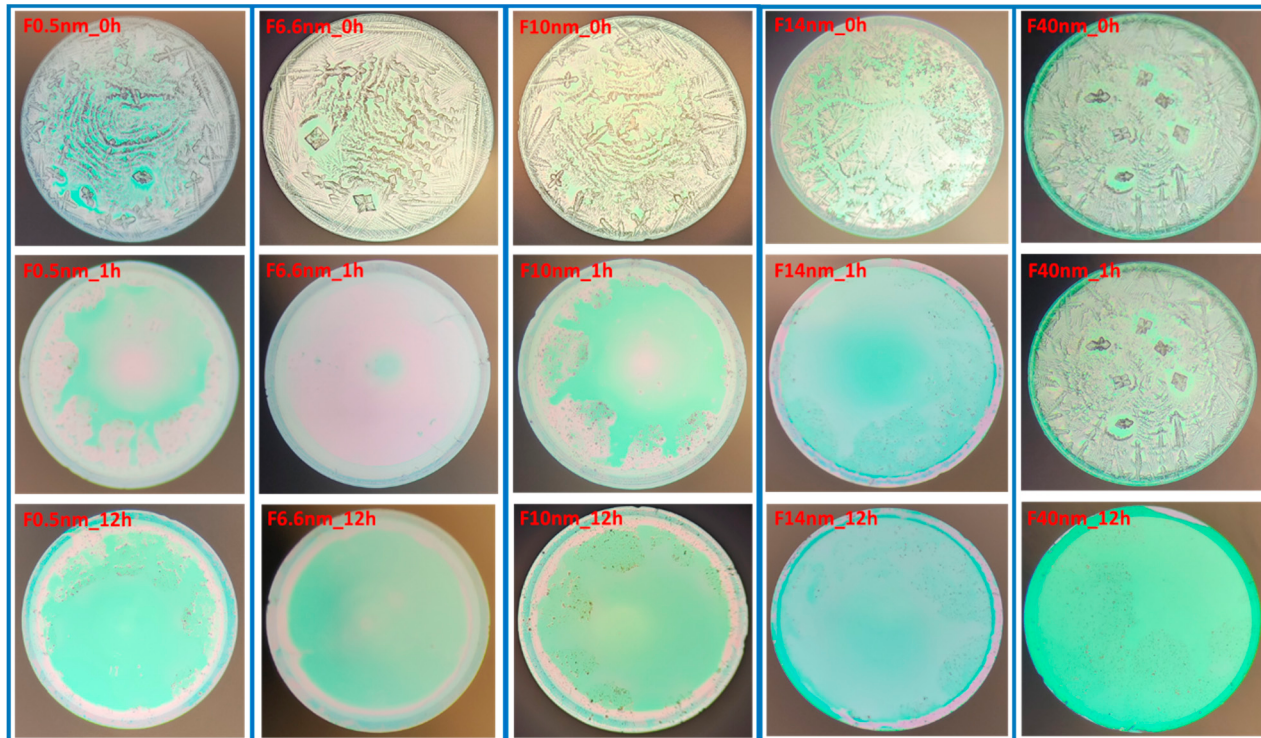

**Figure S2.** Three groups of fibers with controlled signals ranging from 0.5 nm to 40 nm were prepared to evaluate the effect of high-purity ethanol on cleaning and regenerating the fibers. Data showed that no fiber can be fully cleaned for reuse under the condition tested.

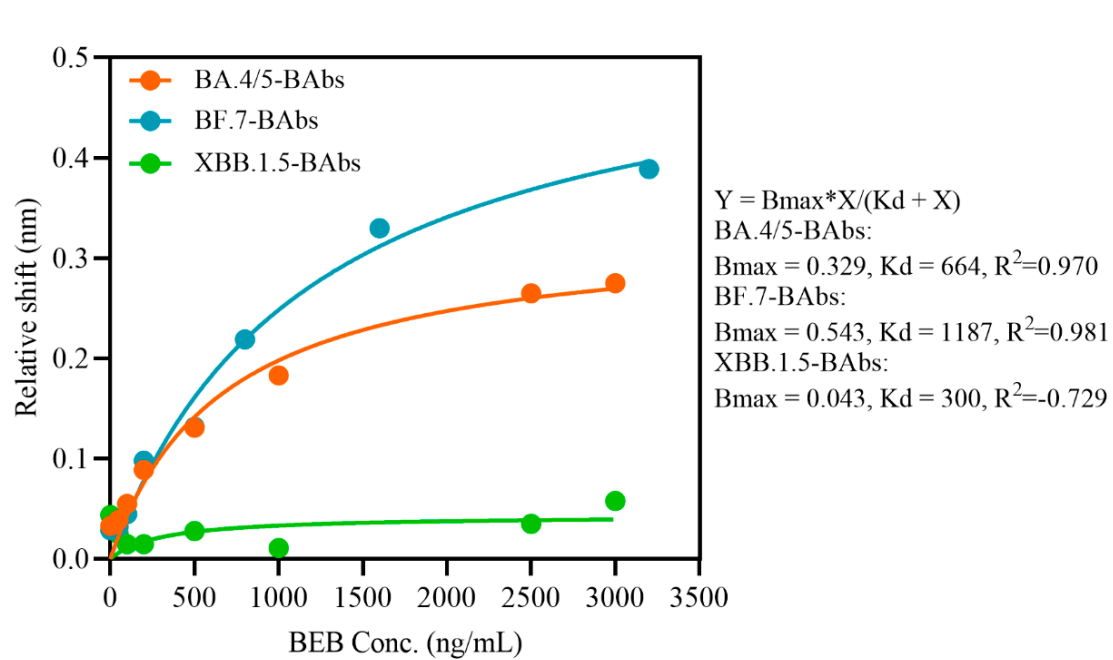

**Figure S3.** Binding activities of BEB towards BA.4/BA.5, BF.7 and XBB.1.5, respectively, showing no interaction between BEB and the latest XBB.1.5.

## Supplementary Tables

**Table S1.** The FO-BLI biosensor for multiplexed biosensing of NAbs Towards WT and Omicron in Both Sera and DBS Using AMEC as the signal enhancer.

| Main Items                                                                                                                                                                            | Assay conditions <sup>1</sup>        | Anti-WT RBD NAbs                              | Anti-Omicron RBD NAbs (BA.4/BA.5, BF.7, XBB.1.5)                 |
|---------------------------------------------------------------------------------------------------------------------------------------------------------------------------------------|--------------------------------------|-----------------------------------------------|------------------------------------------------------------------|
| Capture Loading                                                                                                                                                                       | Probe                                | SA sensor                                     | SA sensor                                                        |
|                                                                                                                                                                                       | Capture protein (conc.) <sup>1</sup> | hACE2-B (5 ug/mL)                             | hACE2-B (5 ug/mL)                                                |
|                                                                                                                                                                                       | Capture buffer <sup>2</sup>          | SD                                            | SD                                                               |
|                                                                                                                                                                                       | Capture shift                        | 1.0 nm                                        | 1.0 nm                                                           |
|                                                                                                                                                                                       | Washing                              | 30s in SD                                     | 30s in SD                                                        |
| Sample Processing                                                                                                                                                                     | Sample type                          | Sera, DBS                                     | Sera, DBS                                                        |
|                                                                                                                                                                                       | Sample volume                        | 5 µL                                          | 5 µL                                                             |
|                                                                                                                                                                                       | Sample dilution                      | 1/100                                         | 1/100                                                            |
|                                                                                                                                                                                       | Sample buffer                        | [DBS: 1/25 pre-diluted]<br>High-salt SD       | [DBS: 1/25 pre-diluted]<br>High-salt SD                          |
|                                                                                                                                                                                       | Protein RBD conjugate                | WT-HRP                                        | Omi.-HRP                                                         |
| Competitive Binding                                                                                                                                                                   | Protein-HRP conc.                    | WT-HRP                                        | BA.4/BA.5-HRP: 1/3000<br>BF.7-HRP: 1/4000<br>XBB.1.5-HRP: 1/1000 |
|                                                                                                                                                                                       | Dilution buffer                      | High-salt SD                                  | High-salt SD                                                     |
|                                                                                                                                                                                       | Competitive binding                  | 100 uL sample +<br>100 uL WT-HRP              | 100 uL sample +<br>100 uL Omi.-HRP                               |
|                                                                                                                                                                                       | Binding time                         | 5 min                                         | 5 min                                                            |
|                                                                                                                                                                                       | Washing                              | 30 s in high-salt SD                          | 30 s in high-salt SD                                             |
| Amplify Signals                                                                                                                                                                       | Enhancer                             | AMEC                                          | AMEC                                                             |
|                                                                                                                                                                                       | Enhancing time                       | 1 - 2 min                                     | 1 - 2 min                                                        |
|                                                                                                                                                                                       | Calibrators                          | WT-R001                                       | BEB (not for XBB.1.5-NAbs)                                       |
|                                                                                                                                                                                       | Detection range                      | 10 - 200 ng/mL                                | 10 - 2000 ng/mL                                                  |
|                                                                                                                                                                                       | Signal unit                          | Relative inhibition percentage                | Relative inhibition percentage                                   |
| Assay Properties                                                                                                                                                                      | LoD for sera                         | WT-NAbs: 4.9% inhibition                      | Omi.-NAbs: 0.0% inhibition                                       |
|                                                                                                                                                                                       | LoD for DBS                          | WT-NAbs: 0.0% inhibition                      | Omi.-NAbs: 0.0% inhibition                                       |
|                                                                                                                                                                                       | Detection time <sup>3</sup>          | 6.5 - 7.5 min using pre-functionalized fibers |                                                                  |
|                                                                                                                                                                                       | Fiber regeneration                   | Not allowed                                   | Not allowed                                                      |
| <sup>1</sup> All the conjugated protein-HRP obtained an initial concentration of 0.5 mg/mL before use.                                                                                |                                      |                                               |                                                                  |
| <sup>2</sup> The use of SD buffer to dilute hACE2-B reduced the shift drift over time.                                                                                                |                                      |                                               |                                                                  |
| <sup>3</sup> NAbs detection can be shortened to 6.5 min by slightly increasing the concentration of protein-HRP conjugate while decreasing the enhancer time to 1 min.                |                                      |                                               |                                                                  |
| <sup>4</sup> AMEC, 3-Amino-9-ethylcarbazole; BEB, Bebtelovimab; hACE2-B, biotinylated human ACE2; Omi.-HRP, HRP conjugated with omicron RBD protein; SA, Streptavidin; WT, wide type. |                                      |                                               |                                                                  |

**Table S2.** Summary of performance of DBS microsample (A) positive and (B) negative samples in five pre-selected extraction buffers and (C) extraction efficiency of series of DBS spiked samples in the selected buffer. CV, Coefficient of Variation.

| (A) Inhibition percentages of one positive sample with spiked concentration at 8 ug/mL (i.e., DBS 8) in five pre-selected buffers compared to their serum counterpart (i.e., NAb 8)                                                                                                   |                                                 |        |        |        |        |        |       |        |       |                       |
|---------------------------------------------------------------------------------------------------------------------------------------------------------------------------------------------------------------------------------------------------------------------------------------|-------------------------------------------------|--------|--------|--------|--------|--------|-------|--------|-------|-----------------------|
| Sample                                                                                                                                                                                                                                                                                | Extraction buffer                               | Inhi.1 | Inhi.2 | Inhi.3 | Inhi.4 | Inhi.5 | Mean  | STD    | CV    |                       |
| NAb 8                                                                                                                                                                                                                                                                                 | 100× sera                                       | 75.5%  | 74.0%  | 72.0%  | 78.8%  | N/A    | 75.1% | 2.9%   | 3.8%  |                       |
|                                                                                                                                                                                                                                                                                       | Superblock T20                                  | 51.9%  | 51.8%  | 50.2%  | 69.5%  | 67.9%  | 58.2% | 9.6%   | 16.4% |                       |
|                                                                                                                                                                                                                                                                                       | PBS+T80                                         | 64.8%  | 64.9%  | 62.6%  | 73.1%  | 72.6%  | 67.6% | 4.9%   | 7.2%  |                       |
|                                                                                                                                                                                                                                                                                       | PBS+0.5%BSA                                     | 72.6%  | 64.8%  | 67.0%  | 77.6%  | 74.5%  | 71.3% | 5.3%   | 7.4%  |                       |
|                                                                                                                                                                                                                                                                                       | PBS+0.05%T20                                    | 64.6%  | 73.2%  | 68.0%  | 79.0%  | 77.1%  | 72.4% | 6.1%   | 8.4%  |                       |
|                                                                                                                                                                                                                                                                                       | PBS+0.05%T20+2%BSA                              | 70.9%  | 71.7%  | 77.6%  | 80.8%  | N/A    | 75.2% | 4.8%   | 6.3%  |                       |
| (B) Inhibition percentages of one negative sample (i.e., DBS 0) in the five pre-selected buffers compared to their serum counterpart (i.e., NAb 0)                                                                                                                                    |                                                 |        |        |        |        |        |       |        |       |                       |
| Sample                                                                                                                                                                                                                                                                                | Extraction Buffer                               |        | Inhi.1 | Inhi.2 | Mean   |        | STD   | CV     |       |                       |
| NAb 0                                                                                                                                                                                                                                                                                 | 100× sera (as control)                          |        | 1.1%   | -1.1%  | 0.0%   |        | 1.5%  | N/A    |       |                       |
|                                                                                                                                                                                                                                                                                       | Superblock T20                                  |        | -10.7% | -2.3%  | -6.5%  |        | 5.9%  | -91.2% |       |                       |
|                                                                                                                                                                                                                                                                                       | PBS+T80                                         |        | -0.6%  | -1.1%  | -0.9%  |        | 0.4%  | -47.4% |       |                       |
|                                                                                                                                                                                                                                                                                       | PBS+0.5%BSA                                     |        | -0.4%  | -1.0%  | -0.7%  |        | 0.4%  | -59.6% |       |                       |
|                                                                                                                                                                                                                                                                                       | PBS+0.05%T20                                    |        | 2.8%   | 1.5%   | 2.1%   |        | 0.9%  | 43.3%  |       |                       |
|                                                                                                                                                                                                                                                                                       | PBS+0.05%T20+2%BSA                              |        | 2.9%   | 2.5%   | 2.7%   |        | 0.2%  | 8.9%   |       |                       |
| (C) Extraction efficiency of the DBS microsample using spiked WT-R001 concentrations in the selected extraction buffer of PBS+0.05%T20+2%BSA. Measured concentrations were interpolated from the inhibition curve of the AMEC-based FO-BLI NAb biosensor in sera as shown in Fig. 1B. |                                                 |        |        |        |        |        |       |        |       |                       |
| Spiked (ug/mL)                                                                                                                                                                                                                                                                        | Measured Conc. in DBS extracts (ug/mL, n = 3-6) |        |        |        |        |        |       |        |       | Extraction Efficiency |
|                                                                                                                                                                                                                                                                                       | Test 1                                          | Test 2 | Test 3 | Test 4 | Test 5 | Test 6 | Mean  | STD    | CV    |                       |
| 0                                                                                                                                                                                                                                                                                     | 0.00                                            | 0.00   | 0.00   | 0.00   | /      | /      | 0.00  | 0.00   | N/A   | N/A                   |
| 2.5                                                                                                                                                                                                                                                                                   | /                                               | 1.98   | 2.15   | 2.21   | /      | /      | 2.11  | 0.12   | 5.7%  | 84.4%                 |
| 4                                                                                                                                                                                                                                                                                     | 3.46                                            | 2.45   | 3.02   | 3.28   | 3.60   | 3.60   | 3.23  | 0.44   | 13.7% | 80.9%                 |
| 8                                                                                                                                                                                                                                                                                     | 5.51                                            | 4.84   | 6.07   | 7.08   | 7.30   | 6.70   | 6.25  | 0.95   | 15.3% | 78.1%                 |
| 16                                                                                                                                                                                                                                                                                    | 14.30                                           | 12.62  | 14.38  | 14.62  | 14.20  | 14.50  | 14.10 | 0.74   | 5.3%  | 88.2%                 |
| Overall extraction efficiency                                                                                                                                                                                                                                                         |                                                 |        |        |        |        |        |       |        |       | 80.9%                 |
| STD                                                                                                                                                                                                                                                                                   |                                                 |        |        |        |        |        |       |        |       | 4.4%                  |
| CV                                                                                                                                                                                                                                                                                    |                                                 |        |        |        |        |        |       |        |       | 5.4%                  |

**Table S3.** Seropositivity towards the latest omicron subvariants of all 94 sera samples at all timepoints.

| Sample ID  |           | NAb (in inhibition percentage) |           |       |         |
|------------|-----------|--------------------------------|-----------|-------|---------|
| Time point | Donor Nr. | WT                             | BA.4/BA.5 | BF.7  | XBB.1.5 |
| Day 7      | 13        | 28.1%                          | 8.7%      | 0.0%  | 0.0%    |
|            | 10        | 73.7%                          | 3.2%      | 2.3%  | 0.0%    |
| Day 14     | 11        | 57.7%                          | 5.0%      | 6.5%  | 0.0%    |
|            | 13        | 36.9%                          | 9.6%      | 0.0%  | 0.0%    |
| Day 21     | 13        | 42.9%                          | 8.3%      | 0.0%  | 0.0%    |
| Day 29     | 10        | 60.3%                          | 6.4%      | 0.0%  | 0.0%    |
| Day 270    | 6         | 4.1%                           | 3.8%      | 9.5%  | 0.0%    |
|            | 13        | 23.5%                          | 29.5%     | 31.3% | 8.8%    |

|    |      |      |       |      |
|----|------|------|-------|------|
| 14 | 4.3% | 3.0% | 14.9% | 0.0% |
|----|------|------|-------|------|

**Table S4.** Summary of the IC50 defined by the PVNT of three sera NAbs towards Omicron subvariants.

| Sample | Subvariants | PVNT (IC50) | FO-BLI (Inhibition) |
|--------|-------------|-------------|---------------------|
| S1     | BA.4/BA.5   | 86.57       | 5.0%                |
|        | BF.7        | 80.41       | 6.5%                |
|        | XBB.1.5     | 0.0%        | 0.0%                |
| S2     | BA.4/BA.5   | 58.75       | 3.2%                |
|        | BF.7        | 37.24       | 2.3%                |
|        | XBB.1.5     | 0.0%        | 0.0%                |
| S3     | BA.4/BA.5   | 409         | 29.5%               |
|        | BF.7        | 332.2       | 31.3%               |
|        | XBB.1.5     | 134.8       | 8.8%                |

**Table S5.** FO-BLI multiplexed biosensing of BAbs towards both WT strain and Omicron in sera.

| Main Items       | Assay conditions             | Anti-WT RBD BAbs                            | Anti-Omicron RBD BAbs  |                        |                        |
|------------------|------------------------------|---------------------------------------------|------------------------|------------------------|------------------------|
| Capture Loading  | Probe                        | SA sensor                                   | SA sensor              | SA sensor              | SA sensor              |
|                  | Capture (conc.) <sup>1</sup> | RBD-B (2 ug/mL)                             | BA.4/BA.5-B (2 ug/mL)  | BF.7-B (2 ug/mL)       | XBB.1.5-B (2 ug/mL)    |
|                  | Capture buffer <sup>2</sup>  | SD                                          | SD                     | SD                     | SD                     |
|                  | Capture shift                | 1.2 nm                                      | 1.2 nm                 | 1.2 nm                 | 1.2 nm                 |
| Baseline         | Washing                      | 30s in SD                                   | 30s in SD              | 30s in SD              | 30s in SD              |
|                  | Baseline                     | HCS                                         | HCS                    | HCS                    | HCS                    |
|                  | Matrix dilution              | 1/40                                        | 1/40                   | 1/40                   | 1/40                   |
|                  | Baseline time                | 2 min                                       | 2 min                  | 2 min                  | 2 min                  |
| Sample Binding   | Sample type                  | serum                                       | serum                  | serum                  | serum                  |
|                  | Sample volume                | 5 µL                                        | 5 µL                   | 5 µL                   | 5 µL                   |
|                  | Sample dilution              | 1/40                                        | 1/40                   | 1/40                   | 1/40                   |
|                  | Sample buffer                | HS-SD                                       | HS-SD                  | HS-SD                  | HS-SD                  |
| Assay Properties | Sample time                  | 5 min                                       | 5 min                  | 5 min                  | 5 min                  |
|                  | Calibrator <sup>3</sup>      | BEB                                         | BEB                    | BEB                    | N/A                    |
|                  | Detection range              | 50–3000 ng/mL                               | 50-3000 ng/mL          | 50-3000 ng/mL          | N/A                    |
|                  | Signal unit                  | relative binding shift                      | relative binding shift | relative binding shift | relative binding shift |
|                  | Cut-off D                    | 0.007 nm                                    | 0.014 nm               | 0.015 nm               | 0.072 nm               |
|                  | Detection time               | 7.0 min, using the pre-functionalized probe |                        |                        |                        |
|                  | Fiber regeneration           | Allowed                                     |                        |                        |                        |

<sup>1</sup> All the conjugated protein obtained an initial concentration of 1.0 mg/mL before use.

<sup>2</sup> The use of SD buffer to dilute Protein-B reduced the shift drift over time.

<sup>3</sup> Day270 serum of donor 13 may serve as a universal BAbs calibrator for both WT and omicron variants.

<sup>4</sup> BEB, Bebtelovimab; HCS, healthy control serum; HS-SD, high-salt SD buffer.

**Table S6.** Reproducibility of the FO-BLI BAbs biosensor for detecting WT-BAbs in seven individual serum samples from seven individual donors on Day21.

| Donor Nr. | Test 1 (nm) | Test 2 (nm) | Mean (nm) | STD (nm) | CV  |
|-----------|-------------|-------------|-----------|----------|-----|
| 3         | 0.027       | 0.023       | 0.025     | 0.003    | 11% |
| 9         | 0.092       | 0.079       | 0.085     | 0.009    | 10% |
| 10        | 0.439       | 0.460       | 0.450     | 0.015    | 3%  |

|    |       |       |       |       |     |
|----|-------|-------|-------|-------|-----|
| 11 | 0.302 | 0.303 | 0.303 | 0.001 | 0%  |
| 13 | 0.137 | 0.137 | 0.137 | 0.000 | 0%  |
| 14 | 0.084 | 0.096 | 0.090 | 0.009 | 10% |
| 15 | 0.077 | 0.065 | 0.071 | 0.009 | 12% |

**Table S7.** Accuracy of six regression models to predict the inhibition of Day 29 samples. The three parameters as desired were predicted based on four previous measurements of Days 0–21 and compared to the measured inhibition data.

| Regression Model                 | Sera NAbs<br>(RMSE) | DBS NAbs<br>(RMSE) | Sera BAbs<br>(RMSE) |
|----------------------------------|---------------------|--------------------|---------------------|
| Linear model – Linear regression | 3.1%                | 4.3%               | 2.9%                |
| Linear model – Lasso             | 3.1%                | 4.2%               | 2.7%                |
| Polynomial model – 2 degrees     | 4.0%                | 4.8%               | 3.4%                |
| Polynomial model – 3 degrees     | 8.1%                | 4.6%               | 4.9%                |
| Support vector machine (SVM)     | 11.0%               | 7.0%               | 9.7%                |
| Multilayer perceptron (MLP)      | 12.0%               | 7.8%               | 9.3%                |
